# Supplementary material for: Selective catalytic degradation of a lignin model compound into phenol over transition metal sulfates
Source: Royal Society of Chemistry journal article supplement (doi:10.1039/c9ra09706f), 2020-01-01
Supplement: c9ra09706f1.pdf [file c9ra09706f1.pdf]

## Supporting Information

### Selective catalytic degradation of lignin model compound into phenol over transition metal sulfates

Min-ya Wu,<sup>[a]</sup> Jian-tao Lin,<sup>[a]</sup> Zhuang-qin Xu,<sup>[a]</sup> Tian-ci Hua,<sup>[a]</sup> Yuan-cai Lv,<sup>[a]</sup> Yi-fan Liu,<sup>[a]</sup>

Rui-han Pei,<sup>[a]</sup> Qiong Wu,<sup>[a]</sup> Ming-hua Liu\*<sup>[a]</sup>

<sup>a</sup> Fujian Provincial Engineering Research Center of Rural Waste Recycling Technology,

College of Environment & Resources, Fuzhou University, Fuzhou, 350116, China

\*Corresponding Author's: [mhliu2000@fzu.edu.cn](mailto:mhliu2000@fzu.edu.cn)

## Materials

Benzyl phenyl ether (BPE, GC), chromium sulfate ( $\text{Cr}_2(\text{SO}_4)_3 \cdot 6\text{H}_2\text{O}$ , AR), manganese sulfate ( $\text{MnSO}_4 \cdot \text{H}_2\text{O}$ , AR), ferrous sulfate ( $\text{FeSO}_4 \cdot 7\text{H}_2\text{O}$ , AR), cobaltous sulfate ( $\text{CoSO}_4 \cdot 7\text{H}_2\text{O}$ , AR), nickel sulfate ( $\text{NiSO}_4 \cdot 6\text{H}_2\text{O}$ , AR), copper sulfate ( $\text{CuSO}_4 \cdot 5\text{H}_2\text{O}$ , AR), zinc sulfate ( $\text{ZnSO}_4 \cdot 7\text{H}_2\text{O}$ , AR), nickel chloride ( $\text{NiCl}_2 \cdot 6\text{H}_2\text{O}$ , AR), nickel nitrate ( $\text{NiNO}_3 \cdot 6\text{H}_2\text{O}$ , AR), nickel carbonate ( $\text{NiCO}_3$ , AR), phenol (GC), benzyl methyl ether (GC), benzyl alcohol (GC) were supplied by Aladdin bio-chem technology Co., Ltd. (Beijing, China). Methanol (GC) and tetrahydrofuran (GC) were purchased from Merck (Germany).

## Characterization

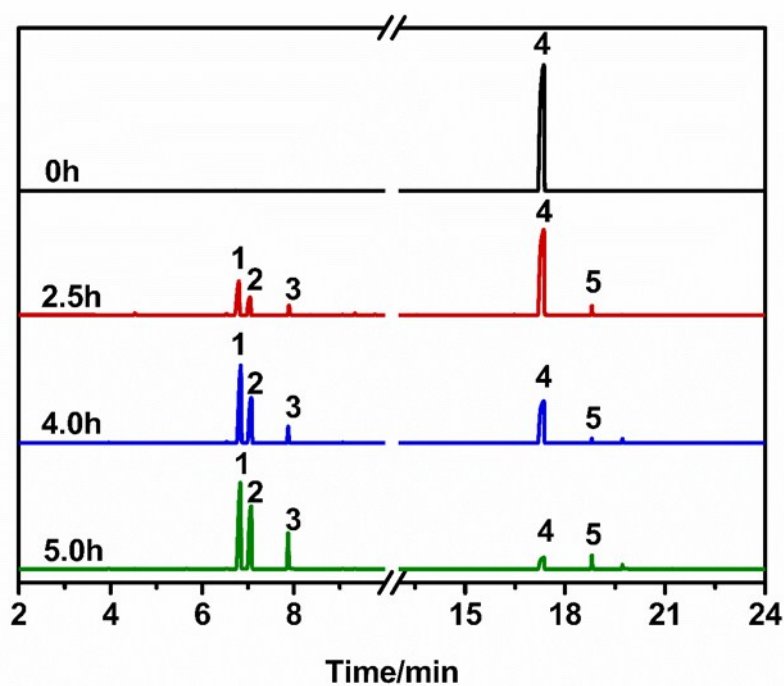

**Fig. S1** GC-MS spectra of BPE degradation products. Condition: 0.3000 g BPE, 1.4 mmol  $\text{NiSO}_4 \cdot 6\text{H}_2\text{O}$ , 200 °C.

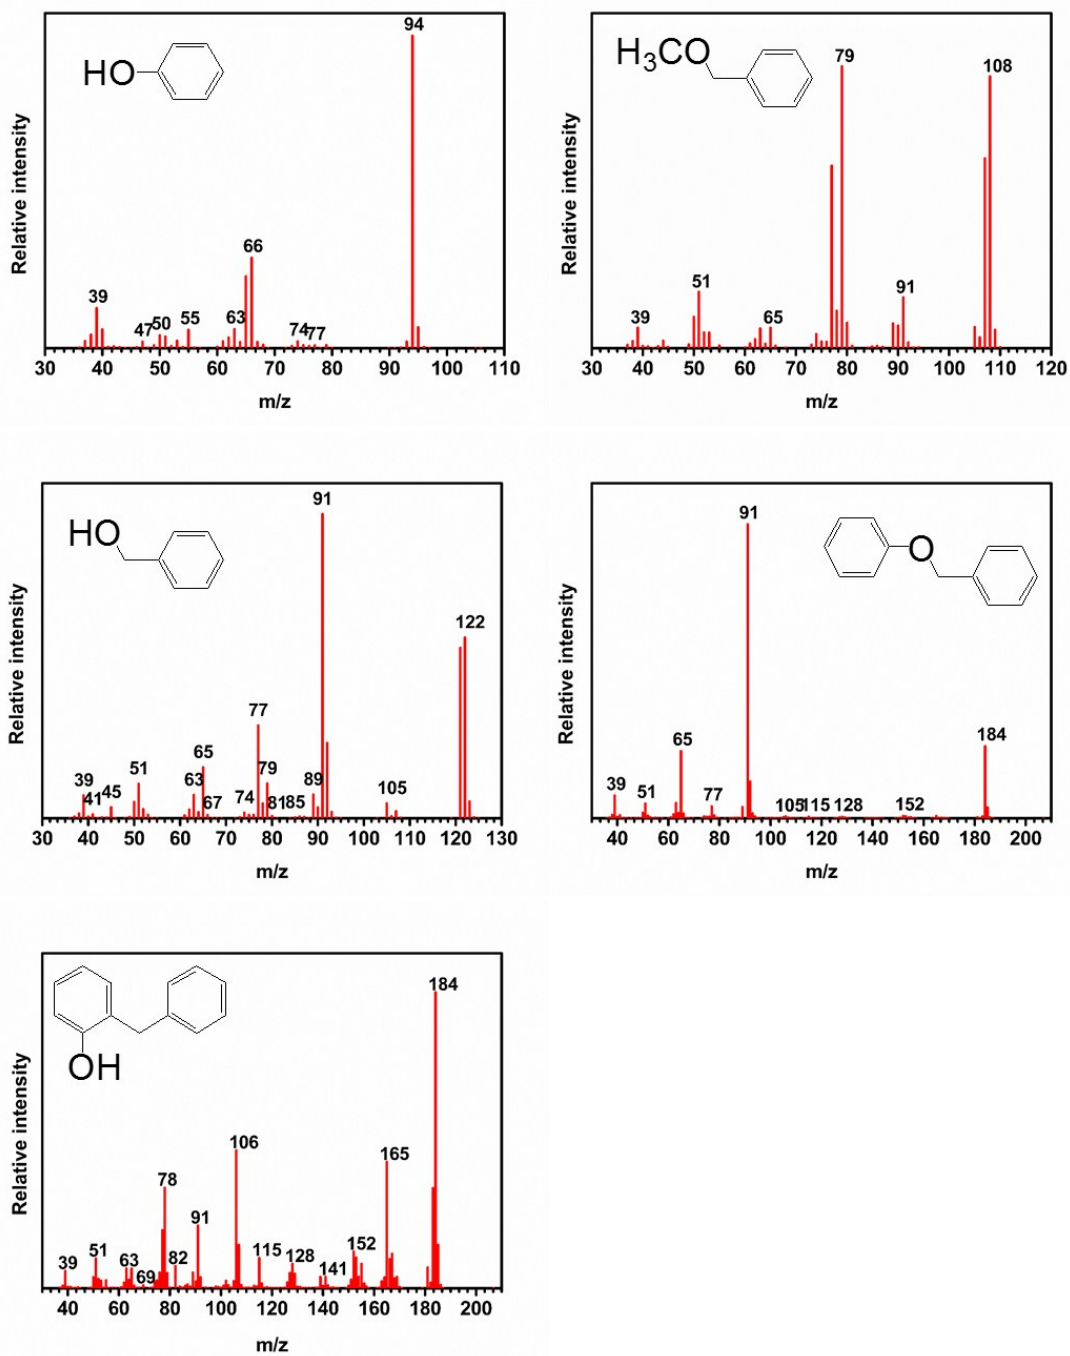

**Fig. S2** MS of BPE primary degradation products. Condition: 300 mg BPE, 1.4 mmol  $\text{NiSO}_4 \cdot 6\text{H}_2\text{O}$ , 200 °C.

**Table S1** The effect of transition metal salts on BPE degradation efficiency and phenol selectivity.

| Run | Catalyst                                               | pH   | Total Degradation (%) | Phenol Selectivity (%) |
|-----|--------------------------------------------------------|------|-----------------------|------------------------|
| 1   | -                                                      | -    | 3.6                   | -                      |
| 2   | $\text{Cr}_2(\text{SO}_4)_3 \cdot 6\text{H}_2\text{O}$ | 2.94 | 38.5                  | 14.9                   |
| 3   | $\text{MnSO}_4 \cdot \text{H}_2\text{O}$               | 4.21 | 18.7                  | -                      |
| 4   | $\text{FeSO}_4 \cdot 7\text{H}_2\text{O}$              | 2.16 | 57.2                  | 20.1                   |
| 5   | $\text{CoSO}_4 \cdot 7\text{H}_2\text{O}$              | 3.72 | 28.3                  | 12.9                   |
| 6   | $\text{NiSO}_4 \cdot 6\text{H}_2\text{O}$              | 2.89 | 90.4                  | 48.6                   |
| 7   | $\text{CuSO}_4 \cdot 5\text{H}_2\text{O}$              | 2.62 | 65.7                  | 24.5                   |
| 8   | $\text{ZnSO}_4 \cdot 7\text{H}_2\text{O}$              | 4.15 | 43.6                  | 22.7                   |
| 9   | $\text{NiCl}_2 \cdot 6\text{H}_2\text{O}$              | 3.44 | 52.2                  | 3.2                    |
| 10  | $\text{NiNO}_3 \cdot 6\text{H}_2\text{O}$              | 5.46 | 30.9                  | 4.3                    |
| 11  | $\text{NiCO}_3$                                        | 7.96 | 18.8                  | -                      |

Condition: 300 mg BPE, 1.4 mmol transition metal salts, 20 mL methanol, 200 °C, 5 h.

- Without catalyst.

**Table S2** The component of primary degradation products.

| Run | Name                | Structure                                                                         | Retention time(min) |
|-----|---------------------|-----------------------------------------------------------------------------------|---------------------|
| 1   | phenol              |  | 6.810               |
| 2   | benzyl methyl ether |  | 7.048               |
| 3   | benzyl alcohol      |  | 7.888               |
| 4   | benzyl phenyl ether |  | 17.235              |
| 5   | 2-Benzyl phenol     |  | 18.800              |

Condition: 300 mg BPE, 1.4 mmol NiSO<sub>4</sub>·6H<sub>2</sub>O, 20 mL methanol, 200 °C.

**Table S3** The selectivity of each products.

| R.T  | BPE   | Phenol | Benzyl methyl<br>ether | Benzyl<br>alcohol |
|------|-------|--------|------------------------|-------------------|
|      | dep%  | sel%   | sel%                   | sel%              |
| 0.5h | 5.63  | 16.34  | 9.21                   | 1.59              |
| 1.0h | 8.56  | 18.57  | 15.40                  | 1.83              |
| 1.5h | 15.62 | 31.03  | 24.76                  | 3.69              |
| 2.0h | 32.20 | 34.45  | 26.57                  | 4.97              |
| 2.5h | 37.10 | 41.36  | 31.72                  | 8.13              |
| 3.0h | 61.16 | 46.18  | 31.82                  | 10.41             |
| 4.0h | 75.60 | 53.14  | 32.10                  | 10.84             |
| 5.0h | 90.82 | 48.65  | 31.22                  | 11.39             |

Condition: 0.3000 g BPE, 1.4 mmol NiSO<sub>4</sub>·6H<sub>2</sub>O, 20 mL methanol, 200 °C.
